# Supplementary material for: Impact of nanosizing a host matrix based on a metal–organic framework on solid-state fluorescence emission and energy transfer
Source: Royal Society of Chemistry journal article supplement (doi:10.1039/d1ma01056e), 2021-12-23
Supplement: d1ma01056e1.pdf [file d1ma01056e1.pdf]

## **Electronic Supplementary Information**

### **Impact of nanosizing a host matrix based on a metal–organic framework on solid-state fluorescence emission and energy transfer**

Hikaru Sakamoto,<sup>†</sup> Akitaka Ito,<sup>†</sup> and Masataka Ohtani,<sup>†,\*</sup>

<sup>†</sup> School of Environmental Science and Engineering, Kochi University of Technology

185 Miyanokuchi, Tosayamada, Kami, Kochi 782-8502, Japan

E-mail: ohtani.masataka@kochi-tech.ac.jp (M.O.)

## Supporting Figures

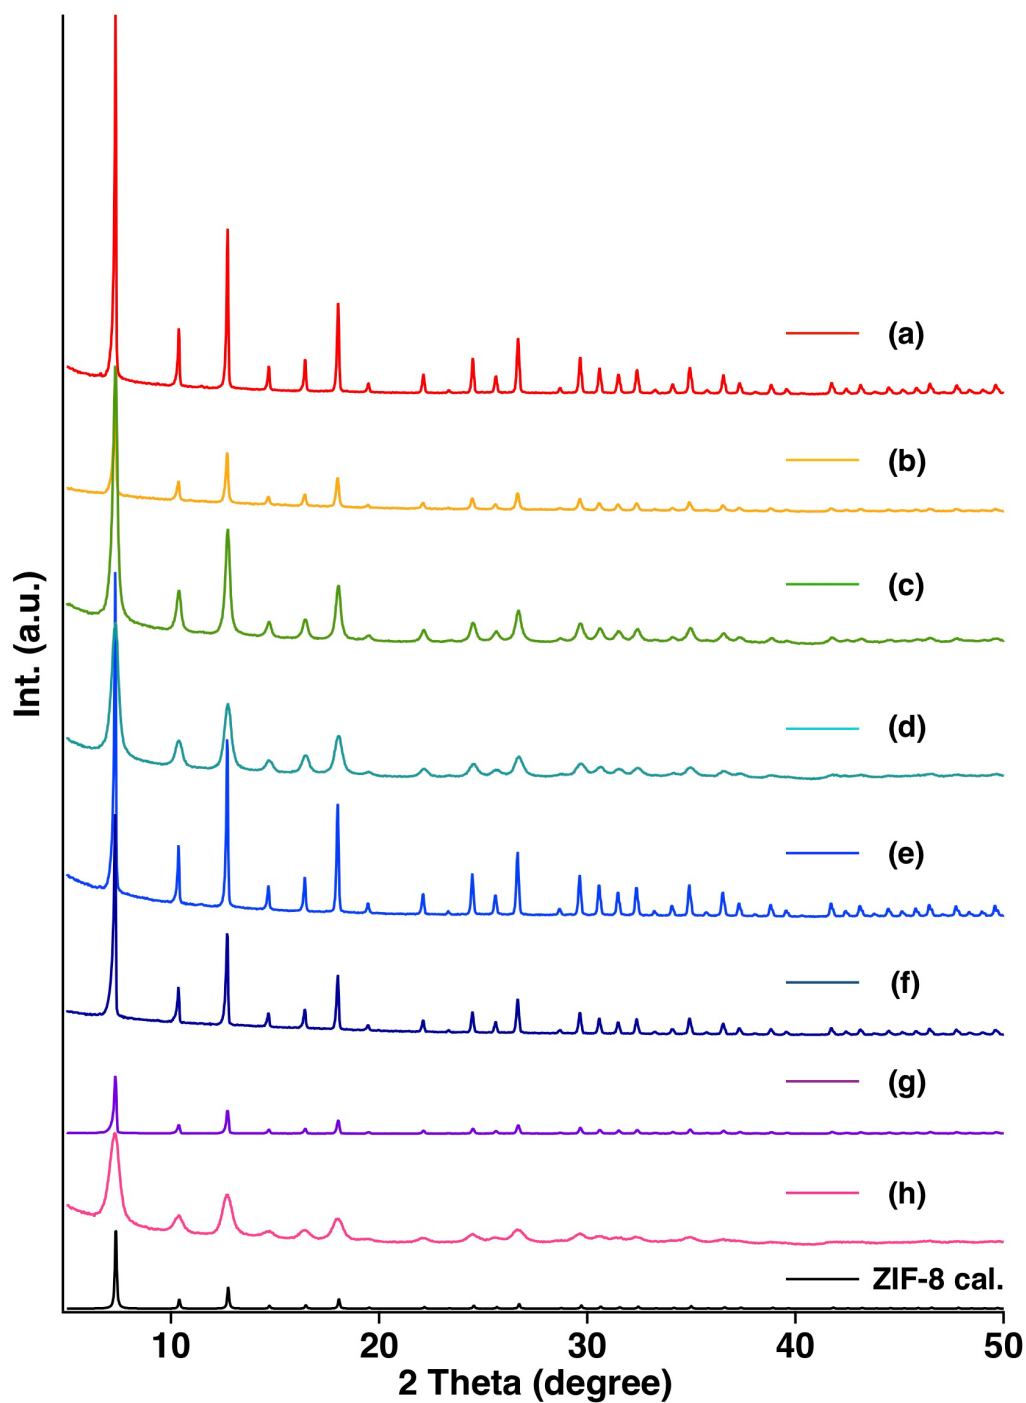

**Figure S1.** PXRD patterns of ZIF-8 synthesized with different conditions: (a) MeOH, (b) EtOH, (c) MeCN, (d) benzonitrile, (e) EG, (f) MeOH (4 °C), (g) MeOH (the precursor zinc solution without 1-MIm), and (h) MeOH with adding triethylamine (1 eq. amount based on 2-MIm), and calculated ZIF-8 reference (CCDC: 864309).

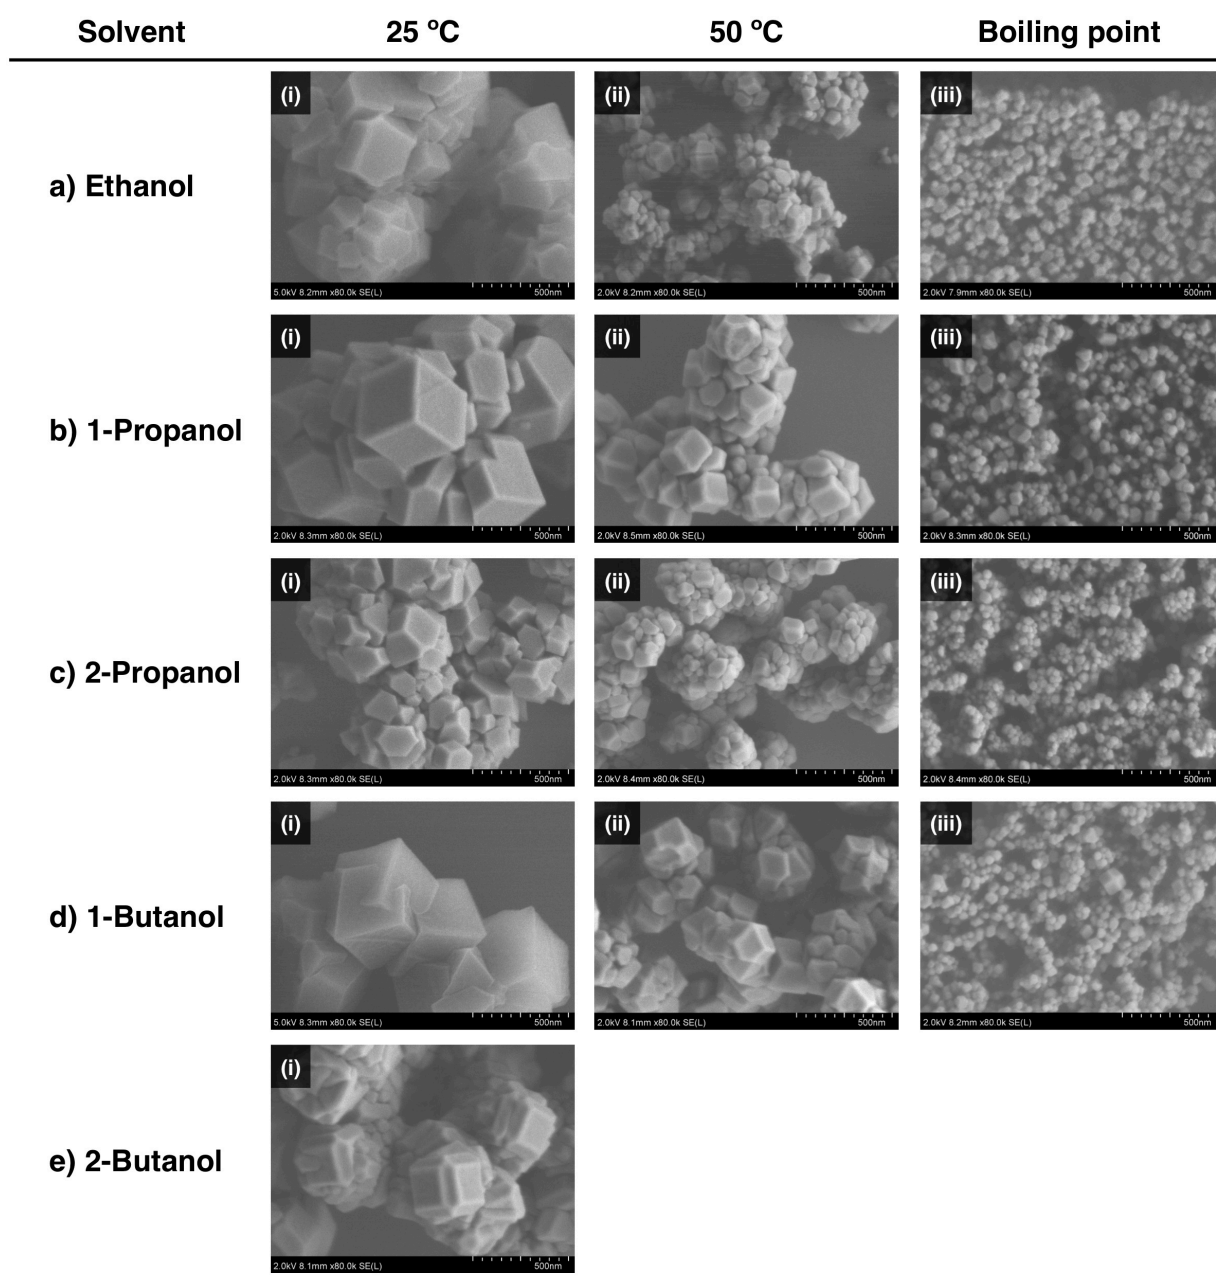

**Figure S2.** SEM images of ZIF-8 synthesized with the different solvent: (a) EtOH, (b) 1-PrOH, (c) 2-PrOH, (d) 1-BuOH, and (e) 2-BuOH and different reaction temperatures (room temperature, 50 °C, and near the boiling point of each solvent) in each solvent.

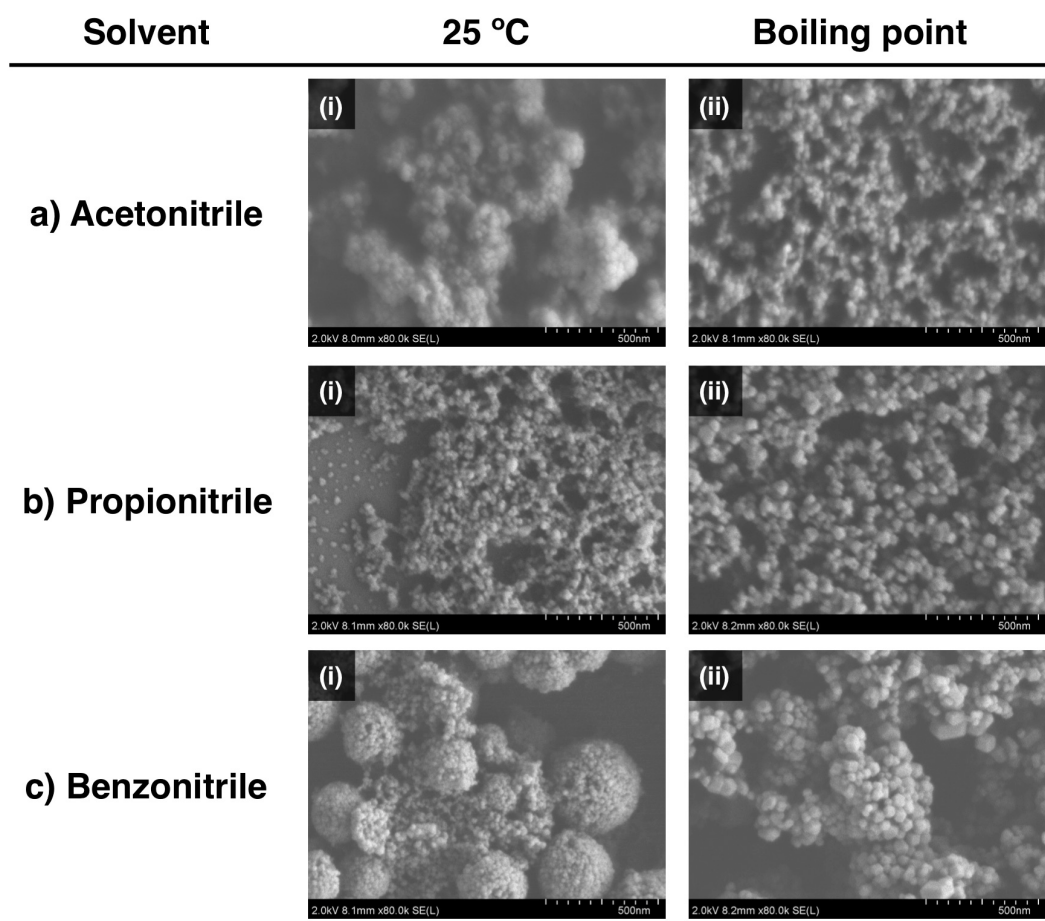

**Figure S3.** SEM images of ZIF-8 synthesized with (a) MeCN, (b) propionitrile, (c) benzonitrile, and different reaction temperatures (room temperature, 50 °C, and near the boiling point of each solvent) in each solvent.

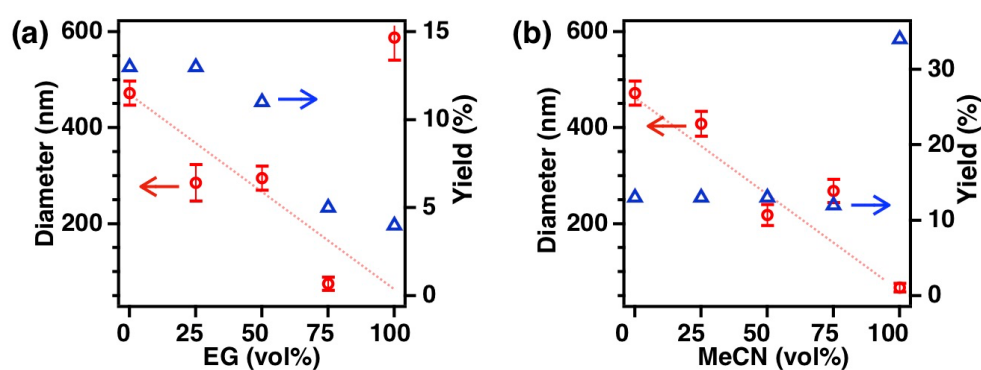

**Figure S4.** (a) Crystal size distribution and/or product yield versus the volume ratio of EG in MeOH, and (b) particle size distribution and/or product yield versus the volume ratio of MeCN in MeOH.



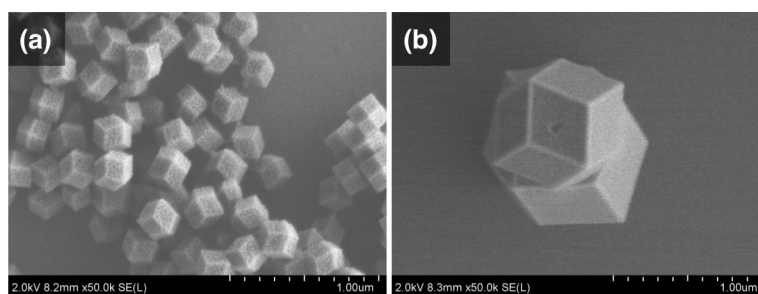

**Figure S5.** (a) SEM images of ZIF-8 synthesized in MeOH at 50 °C (a) and (b) 4 °C.

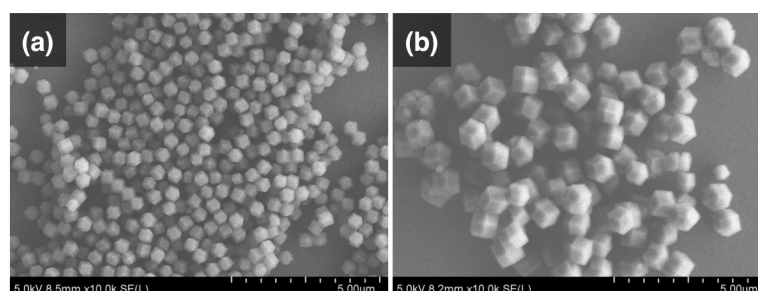

**Figure S6.** SEM images of ZIF-8 synthesized in MeOH at room temperature: (a) addition of 1-MIm to the precursor zinc solution, and (b) without 1-MIm.

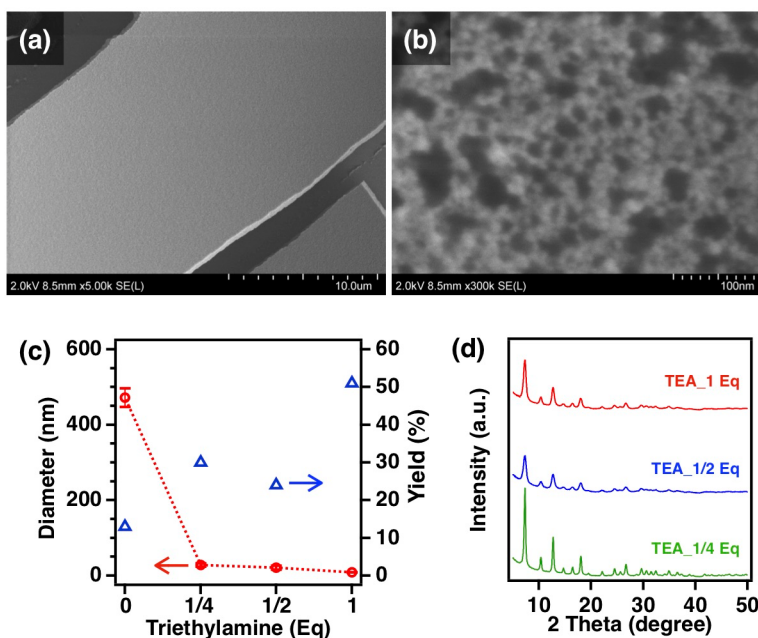

**Figure S7.** SEM images of ZIF-8: each magnification is (a) x5k, (b) x300k, and crystal size distribution and/or product yield versus the equivalent amount of triethylamine (TEA) to Zn-ion content. (d) XRD patterns of ZIF-8 synthesized with different amount of TEA: (red) 1 eq., (blue) 0.5 eq., and (green) 0.25 eq..

**Table S1.** Crystal size of ZIF-8 synthesized with different conditions

| solvent         | Temperature (°C) | TEA (ep) | Diameter (nm) | Yield (%) |
|-----------------|------------------|----------|---------------|-----------|
| Methanol        | 3–4              | —        | 1041 ± 110    | 11        |
| Ethylene glycol | r.t.             | —        | 588 ± 47      | 5         |
| Methanol        | r.t.             | —        | 472 ± 25      | 13        |
| Methanol        | 50               | —        | 256 ± 16      | 15        |
| Ethanol         | 70               | —        | 72 ± 15       | 12        |
| Acetonitrile    | r.t.             | —        | 55 ± 8        | 34        |
| Methanol        | r.t.             | 1/4      | 28 ± 4        | 30        |
| Methanol        | r.t.             | 1/2      | 21 ± 5        | 23        |
| Acetonitrile    | r.t.             | 1        | 17 ± 3        | 70        |
| Methanol        | r.t.             | 1        | 9             | 51        |

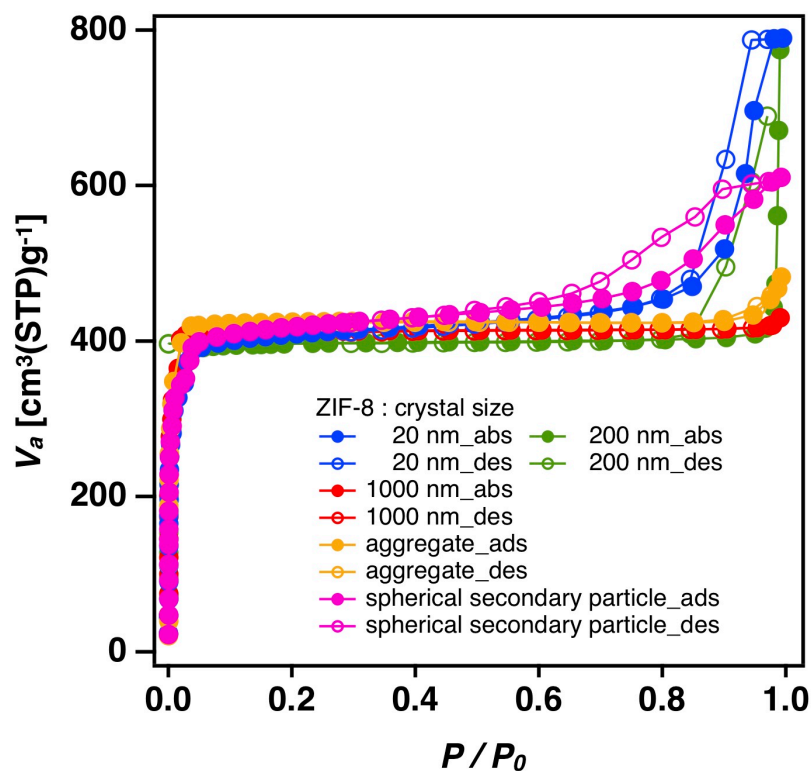**Figure S8.** Nitrogen adsorption (solid symbol) and desorption (open symbol) isotherms of ZIF-8: crystal size\_(blue) ca. 20 nm, (green) ca. 200 nm, (red) ca. 1000 nm, (yellow) 500-nm-sized aggregate (Figure S2a\_r.t.) and (purple) spherical secondary nanoparticle (Figure S3c-i).

**Table S2. Nitrogen gas adsorption/desorption analysis of ZIF-8 crystals**

| crystal size<br>(nm)                | specific surface<br>area, $S_{\text{BET}}$<br>( $\text{m}^2/\text{g}$ ) | pore volume<br>( $\text{cm}^3/\text{g}$ ) | pore diameter<br>(nm) |
|-------------------------------------|-------------------------------------------------------------------------|-------------------------------------------|-----------------------|
| 20                                  | 1600                                                                    | 1.2                                       | 3.0                   |
| 200                                 | 1600                                                                    | 1.2                                       | 3.0                   |
| 1000                                | 1640                                                                    | 0.7                                       | 1.6                   |
| aggregate                           | 1740                                                                    | 0.7                                       | 1.7                   |
| spherical secondary<br>nanoparticle | 1630                                                                    | 0.9                                       | 2.3                   |

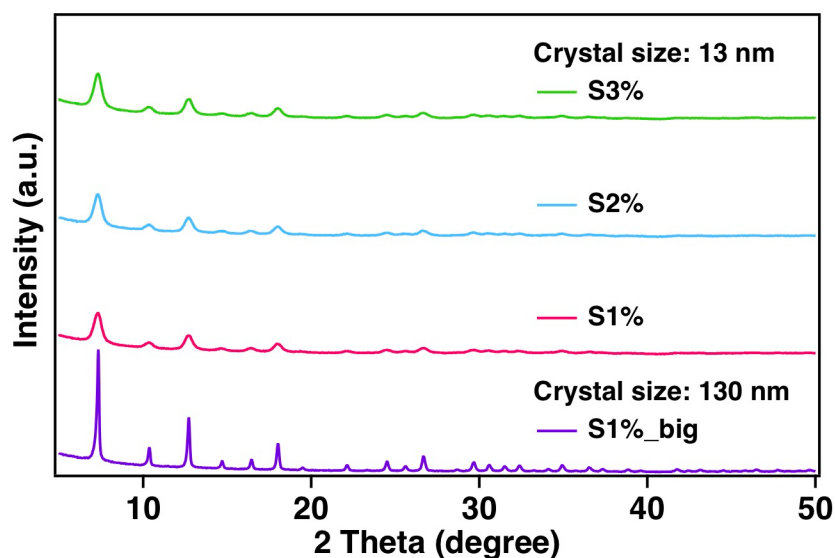

**Figure S9.** XRD patterns of ANS@ZIF-8 with different crystal sizes and amounts of ANS in ZIF-8: (green) 13 nm\_S3%, (blue) 13 nm\_S2%, (pink) 13 nm\_S1%, (violet) 130 nm\_S1%. The content of sulfur due to ANS was determined with atomic% (at%) relative to Zn-ion in ZIF-8 by STEM-EDX analysis.

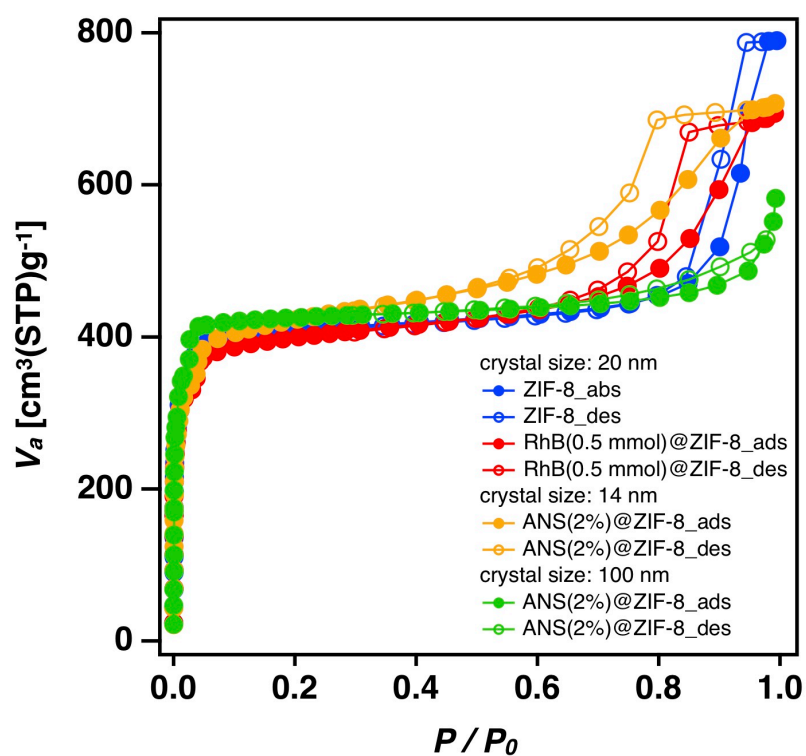

**Figure S10.** Nitrogen adsorption (solid symbol) and desorption (open symbol) isotherms of Samples: (blue) 20 nm sized ZIF-8, (red) RhB(0.5 mmol)@ZIF-8, (yellow) 14 nm sized ANS(2%)@ZIF-8 and (green) 100 nm sized ANS(2%)@ZIF-8.

**Table S3.** Nitrogen gas adsorption/desorption analysis of Samples

| sample              | crystal size (nm) | specific surface area, $S_{\text{BET}}$ ( $\text{m}^2/\text{g}$ ) | pore volume ( $\text{cm}^3/\text{g}$ ) | pore diameter (nm) |
|---------------------|-------------------|-------------------------------------------------------------------|----------------------------------------|--------------------|
| nanoZIF-8           | 20                | 1600                                                              | 1.2                                    | 3.0                |
| RhB(0.5 mmol)@ZIF-8 | 20                | 1460                                                              | 1.0                                    | 2.9                |
| ANS(2%)@ZIF-8       | 14                | 1580                                                              | 1.1                                    | 2.8                |
|                     | 100               | 1680                                                              | 1.0                                    | 2.1                |

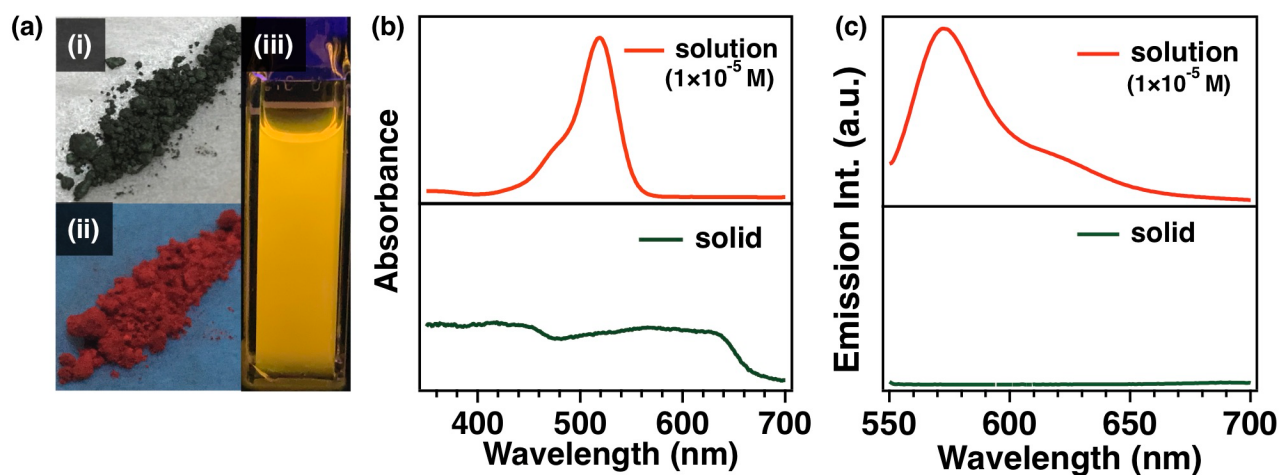

**Figure S11.** Photographs of solid-state RhB under visible light (a-i), under UV light (a-ii), RhB solution in MeCN ( $10\ \mu\text{mol/L}$ ) under UV light (a-iii). (b) UV-vis absorption spectra and (c) fluorescence spectra of (red) RhB in MeCN solution state and (green) RhB in solid state.

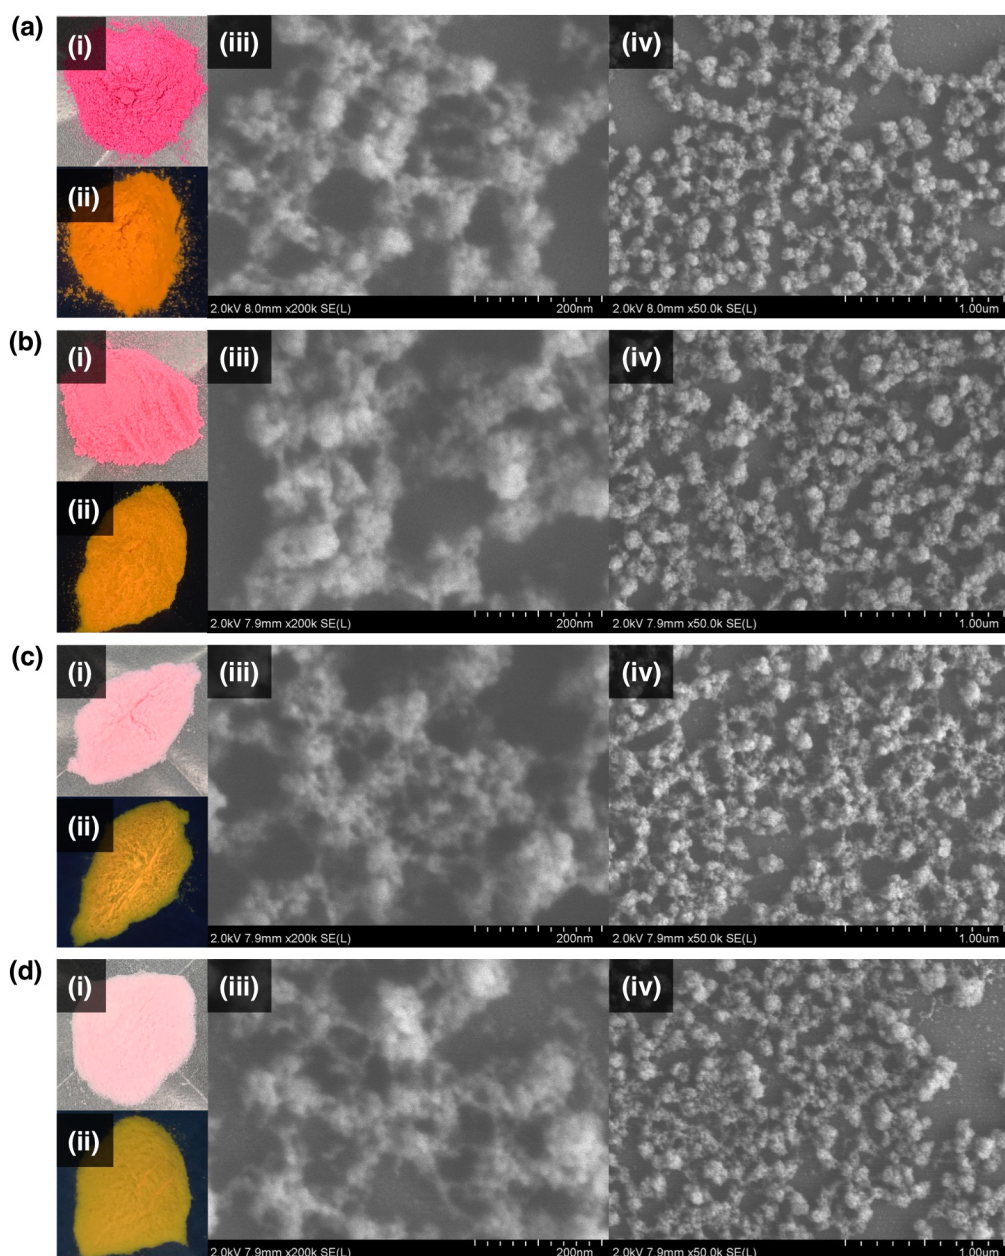

**Figure S12.** Photographs of 14 nm-sized RhB@ZIF-8 under visible light (i), under UV light (ii), and SEM images at x200k (iii) and x50k (iv) magnification: The initial concentrations of RhB are (a) 0.5 mmol, (b) 0.25 mmol, (c) 0.02 mmol, (d) 0.01 mmol, respectively.



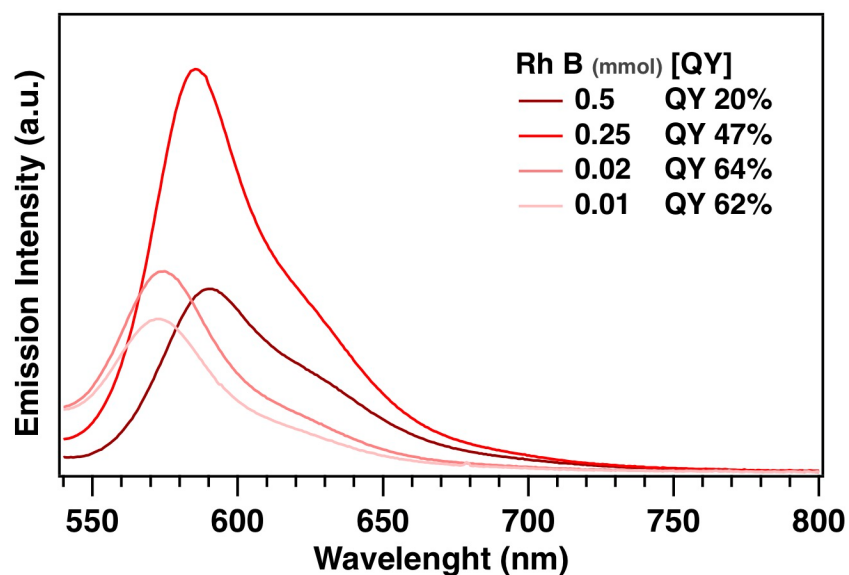

**Figure S13.** Solid-state fluorescence spectra of RhB@ZIF-8 with different encapsulation amounts of RhB: The initial concentration of RhB are (dark red) 0.5 mmol, (b) 0.25 mmol, (c) 0.02 mmol, (d) 0.01 mmol.

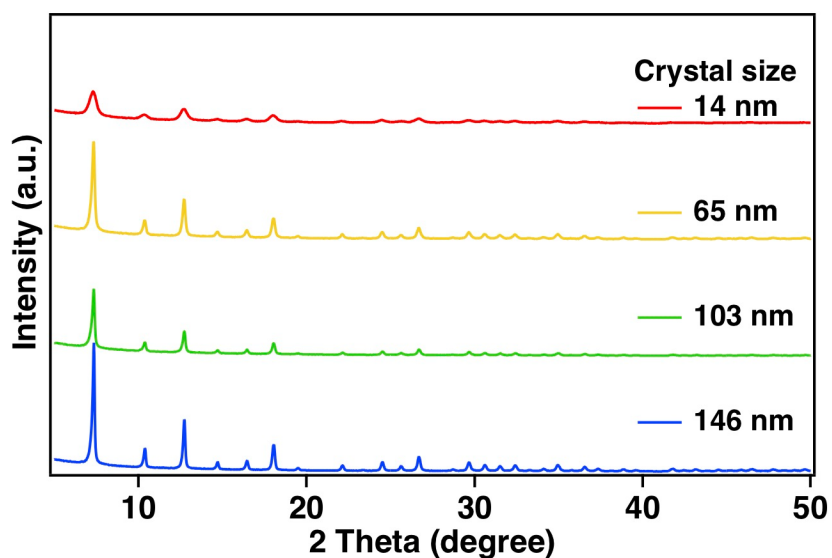

**Figure S14.** PXRD patterns of RhB(0.25 mmol)@ZIF-8 with different crystal sizes: Crystal size are (red) 14 nm, (yellow) 65 nm, (green) 103 nm, (blue) 146 nm, respectively.

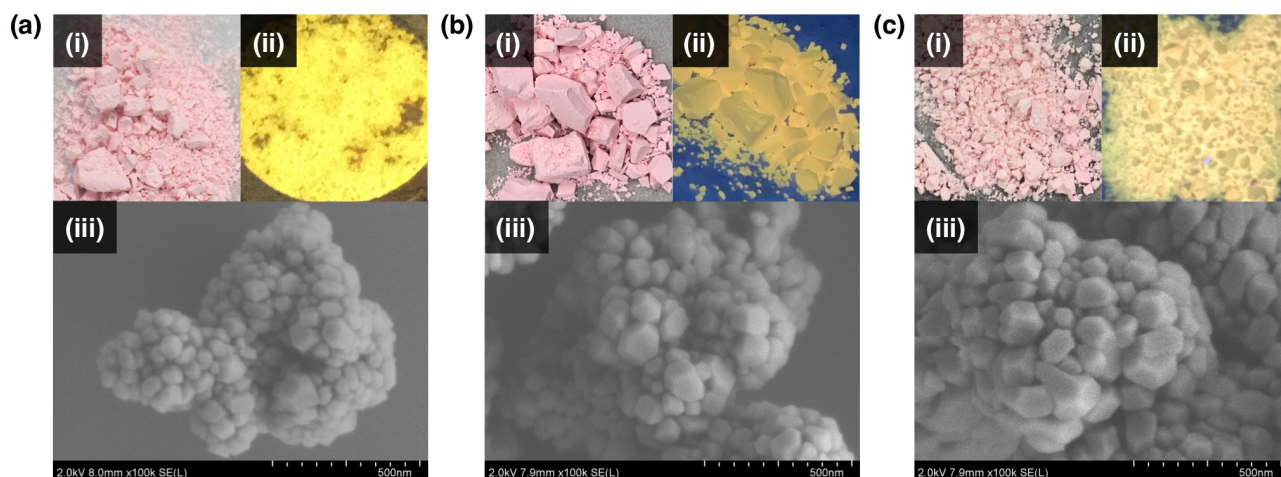

**Figure S15.** Photographs of RhB(0.25 mmol)@ZIF-8 with different crystal sizes under visible light (i), under UV light (ii), and SEM images (iii): Crystal size are (red) 14 nm, (yellow) 65 nm, (green) 103 nm, (blue) 146 nm.

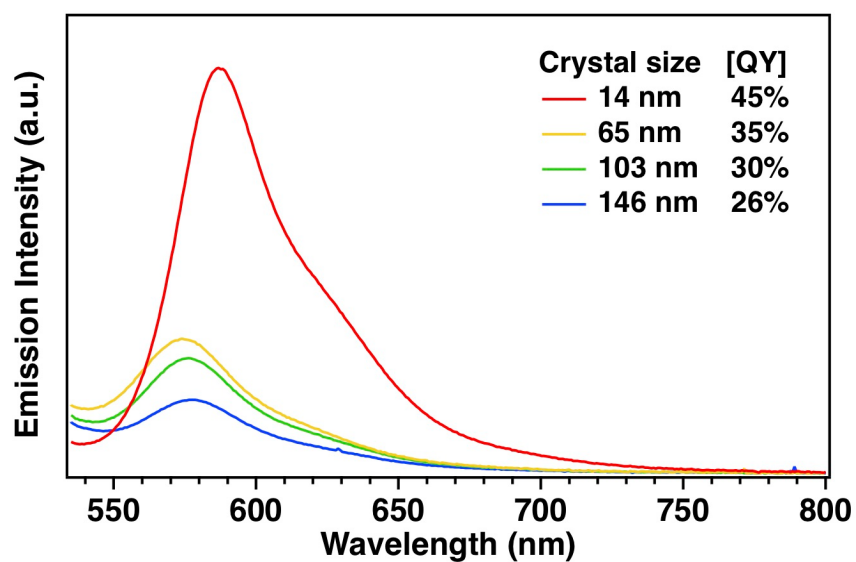

**Figure S16.** Solid-state fluorescence spectra of RhB(0.25 mmol)@ZIF-8 with different crystal sizes: Crystal size are (red) 14 nm, (yellow) 65 nm, (green) 103 nm, (blue) 146 nm.



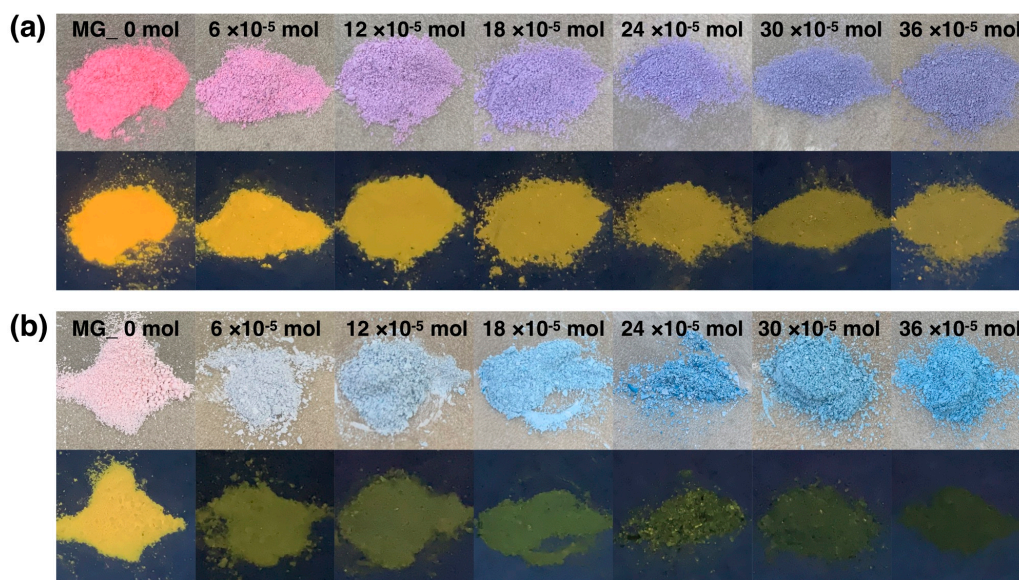

**Figure S17.** Photographs of (a) 16 nm-sized MG-RhB@ZIF-8 and (b) 75 nm-sized MG-RhB@ZIF-8.

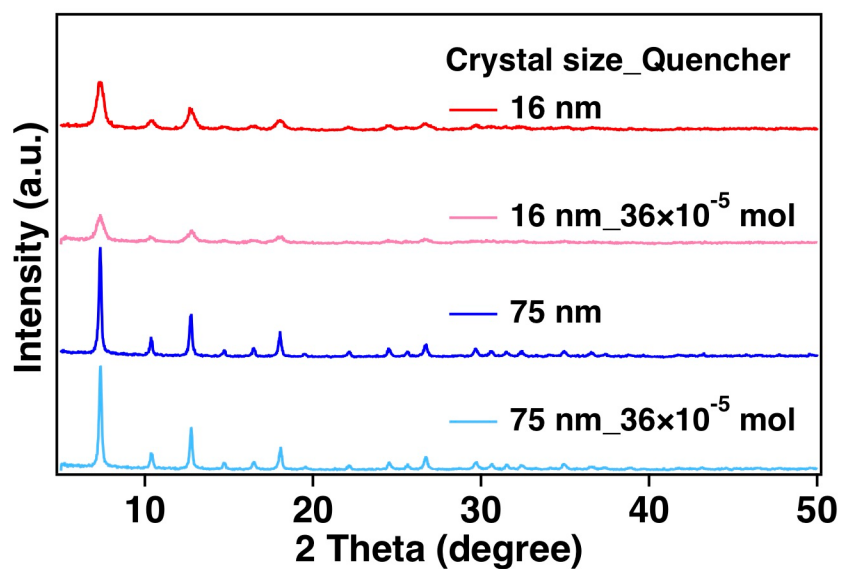

**Figure S18.** PXRD patterns of samples: (red) 16 nm-sized Rh B@ZIF-8 was obtained without quencher, (pink) Rh B@ZIF-8 with adsorbed MG ( $36 \times 10^{-5}$  mol), (blue) 75 nm-sized Rh B@ZIF-8 was obtained without quencher, (light blue) Rh B@ZIF-8 with adsorbed MG ( $36 \times 10^{-5}$  mol).

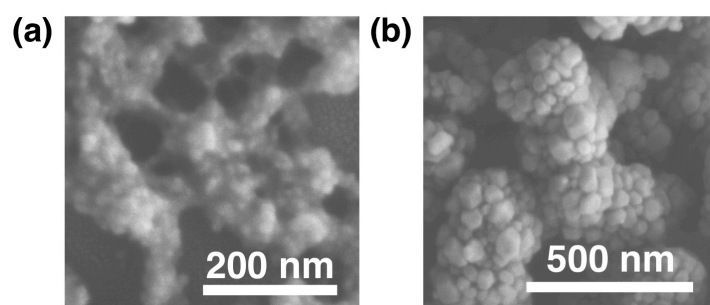

**Figure S19.** SEM images of (a) 16 nm-sized Rh B@ZIF-8 and (b) 75 nm-sized Rh B@ZIF-8.

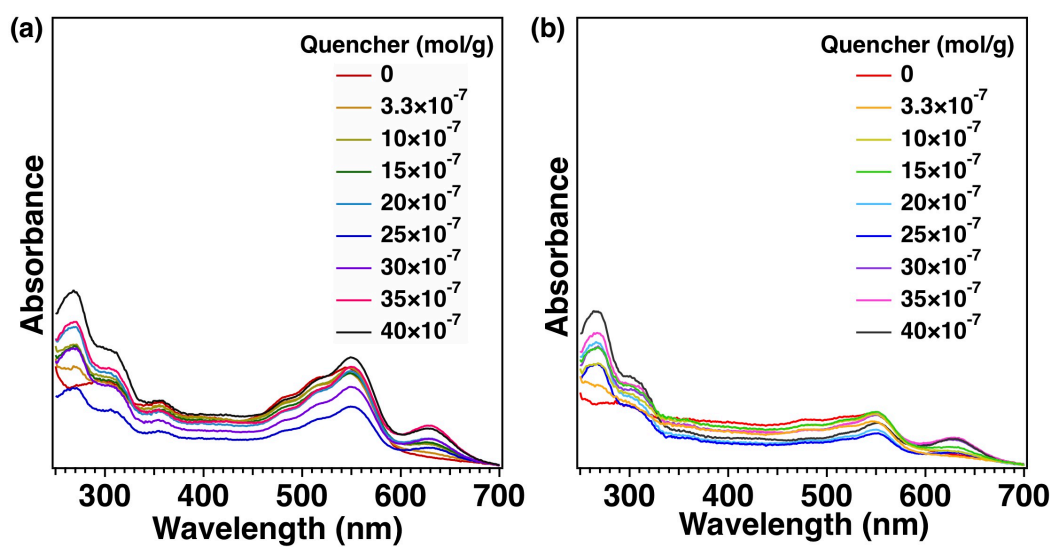

**Figure S20.** Solid-state UV-vis absorption spectra of (a) 16 nm-sized Rh B@ZIF-8 and (b) 75 nm-sized Rh B@ZIF-8.

**Table S4.** Quenching efficiency of RhB solution, 16 nm-sized RhB@ZIF-8 and 75 nm-sized RhB@ZIF-8.

| Rh B solution                                    |                   | RhB@ZIF-8                                        |                                |                                     |
|--------------------------------------------------|-------------------|--------------------------------------------------|--------------------------------|-------------------------------------|
| Quencher concentration<br>(10 <sup>-9</sup> mol) | Quantum yield (%) | Quencher concentration<br>(10 <sup>-5</sup> mol) | Nano crystal Quantum yield (%) | Sub-micro crystal Quantum yield (%) |
| 0                                                | 32                | 0                                                | 50                             | 38                                  |
| 2                                                | 21                | 1.5                                              | 34                             | 29                                  |
| 4                                                | 15                | 3                                                | 29                             | 22                                  |
| 6                                                | 11                | 6                                                | 23                             | 16                                  |
| 8                                                | 9                 | 9                                                | 14                             | 8                                   |
| 10                                               | 8                 | 12                                               | 10                             | 7                                   |
| 12                                               | 7                 | 18                                               | 11                             | 3                                   |
| 16                                               | 6                 | 24                                               | 8                              | 2                                   |
| 20                                               | 5                 | 30                                               | 6                              | 1                                   |
| 24                                               | 4                 | 36                                               | 6                              | 0                                   |
